# Supplementary material
Source: HighWire-hosted journal article supplement (https://jnnp.bmj.com/content/89/2/138)
Supplement: inline-supplementary-material-1 [file inline-supplementary-material-1.pdf]

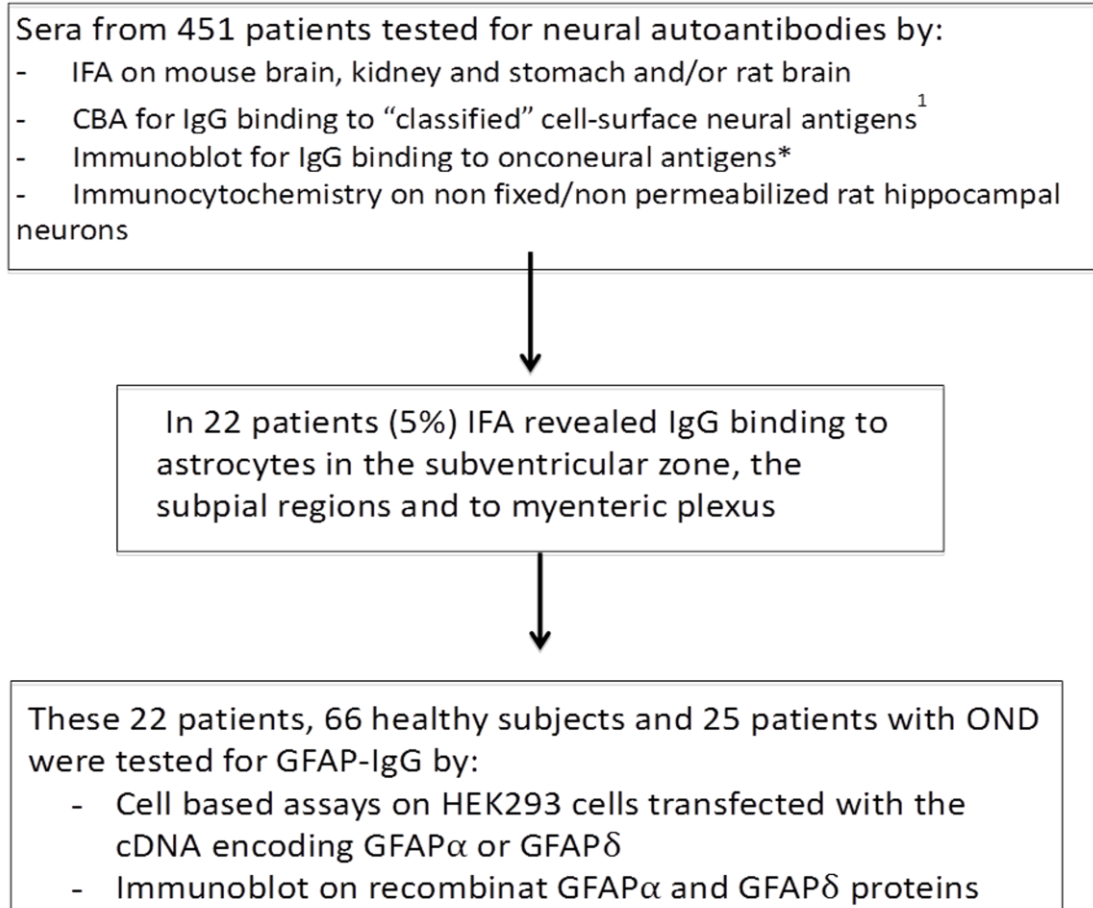

**Flow chart summarizing the neural autoantibodies tests performed.**

Ab= antibodies; CBA= cell-based assay; IFA=indirect immunofluorescence assay;; OND=other neurological diseases.

1. The autoantibodies tested are specified in the methods section.

\* This test was performed if IFA revealed an immunoreactivity pattern consistent with IgG specific for onconeural antigens.
